# Supplementary material
Source: publisher figshare collection journal article supplement (https://f1000.figshare.com/ndownloader/files/757319)
Supplement: Supplementary file 1 [file 757319]

## Sheet: Data
Date	Location recorded	Male 1 SL [mm]	Male 2 SL [mm]	Species	Winner/Looser male (either larger or smaller, or, 1st or 2nd male)	S-Position first male	S-Position second male	Tail-beats first male	Tail-beats second male	Bites first male	Bites second male	Fight duration (no value if dominace was not established) [s]	PC1 (from PCA see main text)
40481	University of Norman	56	52	P. latipinna (Comal River)	large	3	4	0	2	0	0	134	-0.30622
40481	University of Norman	25	28	P. latipinna (Comal River)	small	4	1	1	0	0	0	240	-0.39184
40481	University of Norman	39	40	P. latipinna (Comal River)	small	4	5	3	8	0	3	56	-0.10533
40481	University of Norman	40	39	P. latipinna (Comal River)	large	8	7	9	8	6	3	202	0.23332
40481	University of Norman	48	52	P. latipinna (Comal River)	no	4	7	0	1	3	1		-0.13766
40481	University of Norman	50	47	P. latipinna (Comal River)	no	3	4	0	0	0	0		-0.3291
40482	University of Norman	45	44	P. latipinna (Comal River)	large	2	2	0	0	2	1	400	-0.41663
40482	University of Norman	51	50	P. latipinna (Comal River)	no	4	3	0	0	0	0		-0.3291
40482	University of Norman	38	40	P. latipinna (Comal River)	small	3	3	9	2	6	0	34	-0.19286
40288	University of Frankfurt	21	19	P. reticulata (Venezuela)	large	5	4	6	1	0	1	67	-0.16692
40288	University of Frankfurt	20	20	P. reticulata (Venezuela)	no	10	5	1	0	1	0		-0.01304
40288	University of Frankfurt	21	21	P. reticulata (Venezuela)	2.male	8	17	7	12	1	12	257	0.65873
40288	University of Frankfurt	22	20	P. reticulata (Venezuela)	no	2	6	1	0	0	0		-0.28057
40289	University of Frankfurt	25	24	P. reticulata (Venezuela)	large	6	8	0	0	0	0	90	-0.06949
40289	University of Frankfurt	23	23	P. reticulata (Venezuela)	1.male	11	2	4	0	0	0	180	-0.06081
40290	University of Frankfurt	25	24	P. reticulata (Venezuela)	large	2	1	0	0	0	0	15	-0.47745
40290	University of Frankfurt	19	20	P. reticulata (Venezuela)	no	1	1	0	0	0	0		-0.51454
40290	University of Frankfurt	26	25	P. reticulata (Venezuela)	small	1	2	0	0	0	0	60	-0.47745
40290	University of Frankfurt	26	24	P. reticulata (Venezuela)	no	2	5	0	0	0	0		-0.3291
40291	University of Frankfurt	25	22	P. reticulata (Venezuela)	small	2	4	5	5	5	6	55	-0.16474
40305	University of Frankfurt	22.5	22	P. picta	small	2	2	2	4	4	4	20	-0.30842
40305	University of Frankfurt	25	22	P. picta	small	4	2	0	0	3	9	45	-0.27124
40305	University of Frankfurt	23	20	P. picta	large	7	9	12	7	16	13	102	0.45154
40306	University of Frankfurt	25	23	P. picta	large	16	15	48	72	64	102	165	3.24743
40306	University of Frankfurt	22	24	P. picta	no	7	6	0	0	16	16	96	0.14662
40311	University of Frankfurt	22	21	P. picta	large	23	9	6	0	9	0	210	0.73796
40311	University of Frankfurt	23.5	27	P. picta	no	2	5	0	0	0	0	110	-0.3291
40312	University of Frankfurt	20	23	P. picta	large	3	18	92	148	90	163	315	4.93788
40312	University of Frankfurt	25	28	P. picta	small	4	0	0	0	0	0	10	-0.44037
40322	University of Frankfurt	24	23	L. tridens	no	0	1	0	0	0	0	135	-0.55163
40322	University of Frankfurt	22	22	L. tridens	no	0	2	0	0	0	0	173	-0.51454
40322	University of Frankfurt	27	24	L. tridens	no	0	0	0	0	0	0		-0.58872
40322	University of Frankfurt	31	28	L. tridens	no	0	0	0	0	1	0	107	-0.58081
40322	University of Frankfurt	33	31	L. tridens	no	0	0	0	0	0	0		-0.58872
40323	University of Frankfurt	18	18	L. tridens	no	0	0	1	0	0	0		-0.57728
40323	University of Frankfurt	25	24	L. tridens	no	1	0	4	5	0	1		-0.44075
40323	University of Frankfurt	21	23	L. tridens	no	0	0	0	0	0	0		-0.58872
40323	University of Frankfurt	23	22	L. tridens	no	2	2	0	0	1	1		-0.42454
40324	University of Frankfurt	23	24	L. tridens	no	0	0	2	1	0	0	117	-0.55439
40325	University of Frankfurt	23	22	L. tridens	no	0	0	5	2	1	0	237	-0.50072
40325	University of Frankfurt	26	25	L. tridens	no	0	0	0	0	0	0		-0.58872
40331	University of Frankfurt	26	23	L. tridens	no	0	0	1	0	0	0		-0.57728
40331	University of Frankfurt	23	24	L. tridens	no	0	0	0	0	0	0		-0.58872
40331	University of Frankfurt	32	31	L. tridens	no	0	0	0	0	0	0		-0.58872
40332	University of Frankfurt	26	25	L. tridens	no	4	3	3	2	0	0	381	-0.2719
40332	University of Frankfurt	26	24	L. tridens	large	2	2	0	1	1	0	185	-0.42101
40333	University of Frankfurt	27	24	L. tridens	no	1	1	0	1	0	0	463	-0.5031
40464	University of Norman	22	20	P. reticulata (San Antonio)	large	3	1	0	0	2	0	64	-0.42454
40465	University of Norman	37	37	L. sulphurophila	large	5	4	13	6	12	14	104	0.16818
40465	University of Norman	30	27	L. sulphurophila	large	8	6	7	7	6	3	210	0.1619
40465	University of Norman	29	30	L. sulphurophila	large	2	3	5	8	10	6	184	-0.12794
40466	University of Norman	39	35	L. sulphurophila	large	4	2	2	0	1	0	460	-0.33539
40466	University of Norman	35	33	L. sulphurophila	large	5	4	5	3	4	5	153	-0.09218
40466	University of Norman	30	29	L. sulphurophila	large	2	1	11	13	11	10	359	-0.0367
40466	University of Norman	34	32	L. sulphurophila	large	2	2	4	5	3	4	103	-0.28201
40466	University of Norman	36	33	L. sulphurophila	small	5	3	1	0	0	0	48	-0.28057
40466	University of Norman	25	26	L. sulphurophila	small	1	1	4	2	8	6	159	-0.33512
40467	University of Norman	39	35	L. sulphurophila	large	2	1	2	0	0	1	10	-0.44666
40467	University of Norman	35	33	L. sulphurophila	large	3	5	3	1	1	3	154	-0.2146
40467	University of Norman	33	33	L. sulphurophila	1. male	3	2	5	5	6	12	35	-0.14644
40467	University of Norman	17	16	P. reticulata (San Antonio)	no	3	1	0	0	0	0		-0.44037
40467	University of Norman	15	14	P. reticulata (San Antonio)	no	3	3	0	0	0	0		-0.36619
40467	University of Norman	15	15	P. reticulata (San Antonio)	no	5	5	0	0	0	0		-0.21784
40468	University of Norman	37	34	P. orri	large	8	3	2	0	0	0	100	-0.15787
40468	University of Norman	35	37	P. orri	large	1	6	0	0	0	0	166	-0.3291
40468	University of Norman	31	34	P. orri	large	4	3	0	6	0	2	45	-0.24463
40468	University of Norman	29	31	P. orri	large	2	5	0	4	0	1	20	-0.27542
40468	University of Norman	32	32	P. orri	1. male	5	3	0	0	0	0	66	-0.29201
40469	University of Norman	31	30	P. orri	large	3	3	3	0	0	0	52	-0.33187
40469	University of Norman	33	34	P. orri	small	7	2	5	0	0	0	206	-0.19772
40469	University of Norman	35	33	P. orri	large	4	1	4	0	2	0	37	-0.34169
40469	University of Norman	36	32	P. orri	large	4	2	0	0	0	0	25	-0.36619
40473	University of Norman	18	20	G. sexradiata	no	8	8	7	9	3	1		0.2194
40473	University of Norman	17	16	G. sexradiata	large	4	2	2	0	1	0	104	-0.33539
40473	University of Norman	19	19	G. sexradiata	1st male	10	8	4	4	0	0	560	0.1704
40474	University of Norman	20	18	G. sexradiata	large	9	10	1	0	4	2	389	0.17487
40474	University of Norman	17	16	G. sexradiata	large	7	4	0	2	3	0	328	-0.13413
40474	University of Norman	17	17	G. sexradiata	no	6	3	2	1	0	0		-0.2206
40474	University of Norman	22	24	G. sexradiata	large	3	7	0	3	0	3	106	-0.15978
40474	University of Norman	20	18	G. sexradiata	large	8	10	10	7	4	0	359	0.30502
40475	University of Norman	23	26	H. milleri	no	1	1	0	0	0	0		-0.51454
40475	University of Norman	22	23	H. milleri	no	2	1	0	0	0	0		-0.47745
40475	University of Norman	23	23	H. milleri	no	0	0	0	0	0	0		-0.58872
40476	University of Norman	21	22	H. milleri	small	8	0	2	0	0	0	480	-0.26913
40477	University of Norman	19	18	H. milleri	no	3	1	1	0	0	0		-0.42892
40477	University of Norman	25	23	H. milleri	large	5	2	3	0	0	0	213	-0.29478
40477	University of Norman	24	23	H. milleri	no	9	7	0	0	0	0		0.00469
40477	University of Norman	23	22	H. milleri	no	1	1	0	0	0	0		-0.51454
40477	University of Norman	26	24	H. milleri	large	7	1	0	0	1	0	173	-0.2841
40477	University of Norman	23	23	H. milleri	no	2	2	0	0	0	0		-0.44037
40477	University of Norman	20	22	H. milleri	no	1	0	0	0	0	0		-0.55163
40477	University of Norman	24	23	H. milleri	large	11	3	2	0	3	0	303	-0.02287
40477	University of Norman	23	22	H. milleri	no	3	3	0	0	0	0		-0.36619
40477	University of Norman	21	20	H. milleri	no	2	1	0	0	0	0		-0.47745
40475	University of Norman	17	18	P. reticulata (San Antonio)	small	5	2	2	1	1	0	75	-0.28687
40475	University of Norman	16	15	P. reticulata (San Antonio)	no	2	1	0	0	0	0		-0.47745
40475	University of Norman	14	15	P. reticulata (San Antonio)	small	4	5	5	1	0	0	397	-0.18628
40475	University of Norman	16	14	P. reticulata (San Antonio)	large	5	2	2	0	0	0	74	-0.30622
40485	University of Norman	31	29	P. latipunctata	no	2	1	0	0	0	0		-0.47745
40485	University of Norman	26	26	P. latipunctata	2nd male	13	15	27	35	29	23	139	1.57055
40485	University of Norman	21	20	P. latipunctata	large	4	2	0	0	1	0	100	-0.35828
40486	University of Norman	33	31	P. latipunctata	large	4	1	0	0	0	0	205	-0.40328
40486	University of Norman	27	25	P. latipunctata	no	1	0	0	0	0	0		-0.55163
40486	University of Norman	28	25	P. latipunctata	no	4	3	0	0	0	0		-0.3291
40486	University of Norman	23	23	P. latipunctata	no	1	1	0	0	0	0		-0.51454
40486	University of Norman	24	22	P. latipunctata	no	2	2	0	0	0	0		-0.44037
40486	University of Norman	21	20	P. latipunctata	no	4	3	0	0	0	0		-0.3291

## Sheet: Key
Term	Explanation
Date	Date the data was recorded
Location recorded	Location the data was recorded
Male 1 SL [mm]	Standard length of the first male in a dyad
Male 2 SL [mm]	Standard length of the second male in a dyad
species	species of males
Winner/Looser male (either larger or smaller, or, 1st or 2nd male)	Indicates which male established dominance
S-Position first male	Number of S-position performed by first male
S-Position second male	Number of S-position performed by second male
Tail-beats first male	Number of Tailbeats performed by first male
Tail-beats second male	Number of Tailbeats performed by second male
Bites first male	Number of bites performed by first male
Bites second male	Number of bites performed by second male
Fight duration (no value if dominace was not established) [s]	time until dominance was established in seconds; no value if dominance was not established within 600 seconds
PC1 (from PCA see main text)	Principle Component 1 from PCA
